# Supplementary material for: Chinese medical teachers’ cultural attitudes influence palliative care education: a qualitative study
Source: PubMed Central journal article supplement (PMC7805147; doi:10.1186/s12904-020-00707-w), 2021-01-12
Supplement: 12904_2020_707_MOESM2_ESM.pdf [file 12904_2020_707_MOESM2_ESM.pdf]

**Additional file 2**

**COREQ-Checklist for the manuscript “Chinese Medical Teachers’ Cultural Attitudes influence Palliative Care Education: A Qualitative Study”**

| No.                                            | Item                                     | Requested Information                                                                                                                                                                                                                                          | Reference in Manuscript                                    |
|------------------------------------------------|------------------------------------------|----------------------------------------------------------------------------------------------------------------------------------------------------------------------------------------------------------------------------------------------------------------|------------------------------------------------------------|
| <b>Domain 1: Research team and reflexivity</b> |                                          |                                                                                                                                                                                                                                                                |                                                            |
| Personal characteristics                       |                                          |                                                                                                                                                                                                                                                                |                                                            |
| 1.                                             | Interviewer/facilitator                  | Antonia Willemsen, correspondent author                                                                                                                                                                                                                        | Methods: Interviewer (p. 5)                                |
| 2.                                             | Credentials                              | None                                                                                                                                                                                                                                                           | Title page (p. 1)                                          |
| 3.                                             | Occupation                               | Medical student                                                                                                                                                                                                                                                | Methods: Interviewer (p. 5)                                |
| 4.                                             | Gender                                   | Female                                                                                                                                                                                                                                                         | Methods: Interviewer (p. 5)                                |
| 5.                                             | Experience and training                  | The interviewer was trained individually by co-authors F. Elsner and P. Piret                                                                                                                                                                                  | Methods: Interviewer (p. 5)                                |
| Relationship with participants                 |                                          |                                                                                                                                                                                                                                                                |                                                            |
| 6.                                             | Relationship established                 | No special relationship. Contact about time, place and issue before the interviews was mostly carried out via E-Mail or messenger application.                                                                                                                 | Methods: Sample, paragraph 3 (p. 6)                        |
| 7.                                             | Participant knowledge of the interviewer | Participants knew the goals of the study and the interviewer’s desire to publish. They also knew the interviewer’s occupation and her supporting institution, the German-Chinese Society of Medicine.                                                          | Methods: Participants’ knowledge of the interviewer (p. 6) |
| 8.                                             | Interviewer characteristics              | The interviewer expected PC education structure in China to be low due to her previous work on a systematic review. She also expected difficulties in terms of sampling, language barrier and cultural barriers. No other expectations, to her best knowledge. | Methods: Interviewer (p. 5)                                |
| <b>Domain 2: study design</b>                  |                                          |                                                                                                                                                                                                                                                                |                                                            |
| Theoretical framework                          |                                          |                                                                                                                                                                                                                                                                |                                                            |

|                       |                                       |                                                                                                                                                                                                                                                                                                     |                                                                                                    |
|-----------------------|---------------------------------------|-----------------------------------------------------------------------------------------------------------------------------------------------------------------------------------------------------------------------------------------------------------------------------------------------------|----------------------------------------------------------------------------------------------------|
| 9.                    | Methodological orientation and Theory | Thematic analysis                                                                                                                                                                                                                                                                                   | Methods: Data analysis, paragraph 1 (p. 7)                                                         |
| Participant selection |                                       |                                                                                                                                                                                                                                                                                                     |                                                                                                    |
| 10.                   | Sampling                              | Convenience and snowball sampling                                                                                                                                                                                                                                                                   | Methods: Sample, paragraph 2 (p. 5)                                                                |
| 11.                   | Method of approach                    | First approach: mostly by one of the co-authors, or members of the German Chinese Society of Medicine, then contact between interviewer and possible participant via e-mail, telephone or a messenger application. Sometimes direct first face-to-face contact between interviewer and participant. | Methods: Sample, paragraph 2 (p. 5)                                                                |
| 12.                   | Sample size                           | n=28                                                                                                                                                                                                                                                                                                | Results, paragraph 1 (p. 8)                                                                        |
| 13.                   | Non-participation                     | n=2                                                                                                                                                                                                                                                                                                 | Results, paragraph 1 (p. 8)                                                                        |
| Setting               |                                       |                                                                                                                                                                                                                                                                                                     |                                                                                                    |
| 14.                   | Setting of data collection            | In clinics: offices, meeting rooms, classrooms<br>In hotels: lobbies<br>In one restaurant                                                                                                                                                                                                           | Methods: Interview settings (p. 6)                                                                 |
| 15.                   | Presence of non-participants          | Often                                                                                                                                                                                                                                                                                               | Methods: Interview settings (p. 6)                                                                 |
| 16.                   | Description of sample                 | Characteristics of participants                                                                                                                                                                                                                                                                     | Table 1 (p. 9)                                                                                     |
| Data collection       |                                       |                                                                                                                                                                                                                                                                                                     |                                                                                                    |
| 17.                   | Interview guide                       | Interview guideline attached in separate file. No pilot testing.                                                                                                                                                                                                                                    | Attached File 1: First and final version of interview schedule, Methods: Interview schedule (p. 4) |
| 18.                   | Repeat interviews                     | None                                                                                                                                                                                                                                                                                                | Methods: Paragraph 1 (p. 4)                                                                        |
| 19.                   | Audio/visual recording                | Audio recording                                                                                                                                                                                                                                                                                     | Methods: Data analysis, paragraph 2 (p. 7)                                                         |
| 20.                   | Field Notes                           | Done                                                                                                                                                                                                                                                                                                | Methods: Field Notes (p. 4)                                                                        |
| 21.                   | Duration                              | 10-50 Minutes                                                                                                                                                                                                                                                                                       | Methods: Interview settings (p. 6)                                                                 |
| 22.                   | Data saturation                       | According to the concept of information power: enough interviews for valid results                                                                                                                                                                                                                  | Discussion: Information power (p. 18)                                                              |

|                                        |                                |                                                             |                                                                               |
|----------------------------------------|--------------------------------|-------------------------------------------------------------|-------------------------------------------------------------------------------|
| 23.                                    | Transcripts returned           | None                                                        | Methods: Data analysis, paragraph 4 (p. 8)                                    |
| <b>Domain 3: Analysis and findings</b> |                                |                                                             |                                                                               |
| Data analysis                          |                                |                                                             |                                                                               |
| 24.                                    | Number of data coders          | 1                                                           | Methods: Data analysis, paragraph 4 (p. 8)                                    |
| 25.                                    | Description of the coding tree | Figure 1                                                    | Figure 1                                                                      |
| 26.                                    | Derivation of themes           | Derived from data                                           | Results, paragraph 3, (p. 8)                                                  |
| 27.                                    | Software                       | No software used                                            | Methods: Data analysis, paragraph 2 (p. 7)                                    |
| 28.                                    | Participant checking           | None                                                        | Methods: Data analysis, paragraph 4 (p. 8)                                    |
| Reporting                              |                                |                                                             |                                                                               |
| 29.                                    | Quotations presented           | Yes                                                         | Results: Theme 1, Theme 2, Theme 3 (p. 10-15)                                 |
| 30.                                    | Data and findings consistent   | Yes                                                         | Results: Theme 1, Theme 2, Theme 3 (p. 10-15)                                 |
| 31.                                    | Clarity of major themes        | Yes                                                         | Results: Theme 1, Theme 2, Theme 3 (p. 10-15); Table 2 and Table 3 (p. 27-30) |
| 32.                                    | Clarity of minor themes        | Diversity of participants' attitudes included in the themes | Results, paragraph 4 (p. 8)                                                   |
